# Supplementary material for: Impact of improved representation of volatile organic compound emissions and production of NO x reservoirs on modeled urban ozone production
Source: Copernicus journal article supplement (doi:10.5194/acp-24-9555-2024), 2024-08-29
Supplement: Supplementary file 1 [file acp-24-9555-2024-supplement.pdf]

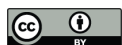

*Supplement of*

## **Impact of improved representation of volatile organic compound emissions and production of NO<sub>x</sub> reservoirs on modeled urban ozone production**

**Katherine R. Travis et al.**

*Correspondence to:* Katherine R. Travis ([katherine.travis@nasa.gov](mailto:katherine.travis@nasa.gov))

The copyright of individual parts of the supplement might differ from the article licence.

Table S1. New species added to GEOS-Chem and their properties.

| GEOS-Chem Species | Formula/Name                            | Molecular weight | Properties <sup>1</sup>                                                                                                                                                        |
|-------------------|-----------------------------------------|------------------|--------------------------------------------------------------------------------------------------------------------------------------------------------------------------------|
|                   |                                         |                  | Is_Gas: true (for all)                                                                                                                                                         |
| C4H6              | C4H6/1,3-butadiene                      | 54.09            | Henry_CR: 4500.0<br>Henry_K0: 1.4e-2<br>Is_Advected: true                                                                                                                      |
| BUTO2             | C4H7O3                                  | 103.10           | Is_Gas: true                                                                                                                                                                   |
| BUTN              | C4H7NO4                                 | 133.1            | DD_F0: 1.0<br>DD_Hstar: 5.0e+5<br>Henry_CR: 0.0<br>Henry_K0: 1.0e+3<br>Is_Advected: true<br>Is_DryDep: true<br>Is_WetDep: true<br>WD_RetFactor: 2.0e-2                         |
| ACR               | C3H4O/acrolein                          | 56.06            | DD_F0: 1.0<br>DD_Hstar: 7.3<br>Henry_CR: 5100.0<br>Henry_K0: 7.3<br>Is_Advected: true<br>Is_DryDep: true<br>Is_Photolysis: true                                                |
| APAN              | C3H3NO5/ peroxyacrylic nitric anhydride | 133.06           | DD_F0: 1.0<br>DD_Hstar: 3.6<br>Henry_CR: 5700.0<br>Henry_K0: 2.94<br>Is_Advected: true<br>Is_DryDep: true<br>Is_Photolysis: true<br>Is_WetDep: true<br>WD_RetFactor: 2.0e-2    |
| ACO3              | C3H3O3                                  | 87.05            | N/A                                                                                                                                                                            |
| ACRO2             | C3H5O4                                  | 105.07           | N/A                                                                                                                                                                            |
| STYR              | C8H8/ styrene                           | 104.15           | Is_Advected: true                                                                                                                                                              |
| EBZ               | C8H10/ethylbenzene                      | 106.167          | Is_Advected: true                                                                                                                                                              |
| TMB               | C8H10/Trimethylbenzenes                 | 106.167          | Is_Advected: true                                                                                                                                                              |
| ALK6              | C7H16/ ≥C6 alkanes                      | 100.20           | Is_Advected: true                                                                                                                                                              |
| R6O2              | C7H15O2/ peroxy radical from ALK6       | 131.19           | N/A                                                                                                                                                                            |
| R6N2              | C7H15NO3/ lumped alkyl nitrate          | 161.2            | DD_F0: 1.0<br>DD_Hstar: 1.7e+4<br>Henry_CR: 6700.0<br>Henry_K0: 0.77<br>Is_Advected: true<br>Is_DryDep: true<br>Is_Photolysis: true<br>Is_WetDep: true<br>WD_RetFactor: 2.0e-2 |
| R6N1              | C7H13O3                                 | 145.18           |                                                                                                                                                                                |
| R6P               | C7H16O2/ peroxide from R4O2             | 132.2            | DD_F0: 1.0<br>DD_Hstar: 2.94e+2<br>Henry_CR: 5200.0<br>Henry_K0: 2.94e+2<br>Is_Advected: true                                                                                  |

| GEOS-Chem Species | Formula/Name                                 | Molecular weight | Properties <sup>1</sup>                                                                                                                                                                                |
|-------------------|----------------------------------------------|------------------|--------------------------------------------------------------------------------------------------------------------------------------------------------------------------------------------------------|
|                   |                                              |                  | Is_Gas: true (for all)                                                                                                                                                                                 |
|                   |                                              |                  | Is_DryDep: true<br>Is_Photolysis: true<br>Is_WetDep: true<br>WD_RetFactor: 2.0e-2                                                                                                                      |
| PHAN              | C2H3NO6/peroxyhydroxyacetic nitric anhydride | 137.0483         | DD_F0: 1.0<br>DD_Hstar: 3.6<br>Henry_CR: 5700.0<br>Henry_K0: 2.94<br>Is_Advected: true<br>Is_DryDep: true<br>Is_Photolysis: true<br>Is_WetDep: true<br>WD_RetFactor: 2.0e-2                            |
| GCO3              | C2H3O4/peroxyacetyl radical for PHAN         | 91.04            | N/A                                                                                                                                                                                                    |
| HACTA             | C2H4O3/hydroxyacetic acid/glycolic acid      | 76.05            | DD_F0: 1.0<br>DD_Hstar: 2.83e+4<br>Henry_CR: 4000.0<br>Henry_K0: 2.83e+4 (Ka = 3.83)<br>Is_Advected: true<br>Is_DryDep: true<br>Is_WetDep: true<br>WD_RetFactor: 2.0e-2                                |
| RNO3              | C7H9NO6/lumped aromatic alkyl nitrate        | 203.15           | DD_F0: 1.0<br>DD_Hstar: 1.7e+4<br>Henry_CR: 5800.0<br>Henry_K0: 1.0<br>Is_Advected: true<br>Is_DryDep: true<br>Is_Photolysis: true<br>Is_WetDep: true<br>WD_RetFactor: 2.0e-2                          |
| TLFUONE           | C5H6O2/ 5-Methyl-2(5H)-furanone              | 98.1             | DD_F0: 1.0<br>DD_Hstar: 2.0e+6<br>Is_Advected: true<br>Is_DryDep: true<br>Is_WetDep: true<br>Henry_CR: 7500.0<br>Henry_K0: 2.0e+6<br>WD_RetFactor: 2.0e-2                                              |
| TLFO2             | C5H7O5                                       | 147.1            | N/A                                                                                                                                                                                                    |
| AROMCHO           | C5H6O4/ (ACCOMECHEO from MCMV3.3.1)          | 130.1            | DD_F0: 1.0<br>DD_Hstar: 2.0e+6<br>Formula: C5H6O2<br>FullName: C5 unsaturated dicarbonyl<br>Is_Advected: true<br>Is_DryDep: true<br>Is_Gas: true<br>Is_WetDep: true<br>MW_g: 98.10<br>Henry_CR: 7500.0 |

| GEOS-Chem Species                                  | Formula/Name                                                                                            | Molecular weight | Properties <sup>1</sup>                                                                                                                                                                          |
|----------------------------------------------------|---------------------------------------------------------------------------------------------------------|------------------|--------------------------------------------------------------------------------------------------------------------------------------------------------------------------------------------------|
|                                                    |                                                                                                         |                  | Is_Gas: true (for all)<br>Henry_K0: 2.0e+6                                                                                                                                                       |
| AROMP                                              | C <sub>5</sub> H <sub>5</sub> NO <sub>8</sub> / (ACCOMEPAN from MCMV3.3.1)                              | 207.1            | DD_F0: 1.0<br>DD_Hstar: 3.6<br>Henry_CR: 5700.0<br>Henry_K0: 2.94<br>Is_Advected: true<br>Is_DryDep: true<br>Is_WetDep: true<br>WD_RetFactor: 2.0e-2                                             |
| AROMCO3                                            | C <sub>5</sub> H <sub>5</sub> O <sub>6</sub>                                                            | 161.09           | N/A                                                                                                                                                                                              |
| MEKPN                                              | C <sub>3</sub> H <sub>5</sub> NO <sub>6</sub> /hydroxypropanonyl peroxy nitrate (C3PAN1 from MCMV3.3.1) | 151.07           | DD_F0: 1.0<br>DD_Hstar: 3.6<br>Henry_CR: 5700.0<br>Henry_K0: 2.94<br>Is_Advected: true<br>Is_DryDep: true<br>Is_WetDep: true<br>WD_RetFactor: 2.0e-2                                             |
| MEKCO3                                             | C <sub>3</sub> H <sub>5</sub> O <sub>4</sub>                                                            | 105.07           | N/A                                                                                                                                                                                              |
| ZRO2                                               | C <sub>7</sub> H <sub>9</sub> O <sub>5</sub>                                                            | 173.16           | N/A                                                                                                                                                                                              |
| RCOOH (currently in GEOS-Chem as a 'dead' species) | C <sub>3</sub> H <sub>6</sub> O <sub>2</sub><br>> C2 organic acids                                      | 74.08            | DD_F0: 1.0<br>DD_Hstar: 1.52e+3<br>Henry_CR: 6800.0<br>Henry_K0: 1.52e+3<br>Is_Advected: true<br>Is_DryDep: true<br>Is_WetDep: true<br>WD_RetFactor: 2.0e-2                                      |
| APINP                                              | C <sub>10</sub> H <sub>18</sub> O <sub>3</sub> /hydroperoxide from APIN                                 | 186.28           | DD_F0: 1.0<br>DD_Hstar: 1.0e+5<br>Henry_CR: 6039.0<br>Henry_K0: 1.0e+5<br>Is_Advected: true<br>Is_DryDep: true<br>Is_Gas: true<br>Is_WetDep: true<br>WD_RetFactor: 2.0e-2                        |
| APINN                                              | C <sub>10</sub> H <sub>17</sub> NO <sub>4</sub> /1st gen organic nitrate from APIN                      | 215.28           | DD_F0: 1.0<br>DD_Hstar: 2.0e+6<br>Henry_CR: 9200.0<br>Henry_K0: 1.7e+4<br>Is_Advected: true<br>Is_DryDep: true<br>Is_Gas: true<br>Is_Photolysis: true<br>Is_WetDep: true<br>WD_RetFactor: 2.0e-2 |
| PINAL                                              | C <sub>10</sub> H <sub>16</sub> O <sub>2</sub> /pinonaldehyde                                           | 186.28           | DD_F0: 1.0<br>DD_Hstar: 1.0e+3<br>Henry_CR: 6039.0<br>Henry_K0: 1.0e+3<br>Is_Advected: true<br>Is_DryDep: true<br>Is_Gas: true<br>Is_WetDep: true                                                |

| GEOS-Chem Species | Formula/Name                                                          | Molecular weight | Properties <sup>1</sup>                                                                                                                                                                          |
|-------------------|-----------------------------------------------------------------------|------------------|--------------------------------------------------------------------------------------------------------------------------------------------------------------------------------------------------|
|                   |                                                                       |                  | Is_Gas: true (for all)<br>WD RetFactor: 2.0e-2                                                                                                                                                   |
| PINONIC           | C10H18O3/pinonic acid                                                 | 186.28           | DD_F0: 1.0<br>DD_Hstar: 3.14e+5<br>Henry_CR: 6039.0<br>Henry_K0: 3.14e+5<br>Is_Advected: true<br>Is_DryDep: true<br>Is_Gas: true<br>Is_WetDep: true<br>WD RetFactor: 2.0e-2                      |
| PINO3H            | C10H18O4/pinonic peracid                                              | 186.28           | DD_F0: 1.0<br>DD_Hstar: 1.0e+5<br>Henry_CR: 6039.0<br>Henry_K0: 1.0e+5<br>Is_Advected: true<br>Is_DryDep: true<br>Is_Gas: true<br>Is_WetDep: true<br>WD RetFactor: 2.0e-2                        |
| C96O2H            | C9H16O3/peroxide from APIN<br>2 <sup>nd</sup> gen                     | 186.28           | DD_F0: 1.0<br>DD_Hstar: 3.14e+5<br>Henry_CR: 6039.0<br>Henry_K0: 3.14e+5<br>Is_Advected: true<br>Is_DryDep: true<br>Is_Gas: true<br>Is_WetDep: true<br>WD RetFactor: 2.0e-2                      |
| C96N              | C9H15NO4/saturated 2 <sup>nd</sup> gen<br>monoterpene organic nitrate | 215.28           | DD_F0: 1.0<br>DD_Hstar: 2.0e+6<br>Henry_CR: 9200.0<br>Henry_K0: 1.7e+4<br>Is_Advected: true<br>Is_DryDep: true<br>Is_Gas: true<br>Is_Photolysis: true<br>Is_WetDep: true<br>WD RetFactor: 2.0e-2 |
| BPINO             | C9H14O/ketone from BPIN                                               | 186.28           | DD_F0: 1.0<br>DD_Hstar: 1.0e+3<br>Henry_CR: 6039.0<br>Henry_K0: 1.0e+3<br>Is_Advected: true<br>Is_DryDep: true<br>Is_Gas: true<br>Is_WetDep: true<br>WD RetFactor: 2.0e-2                        |
| BPINN             | C10H17NO4/saturated 1 <sup>st</sup> gen<br>BPIN organic nitrate       | 215.28           | DD_F0: 1.0<br>DD_Hstar: 2.0e+6<br>Henry_CR: 9200.0<br>Henry_K0: 1.7e+4<br>Is_Advected: true<br>Is_DryDep: true<br>Is_Gas: true<br>Is_Photolysis: true<br>Is_WetDep: true<br>WD RetFactor: 2.0e-2 |

| GEOS-Chem Species | Formula/Name                                                     | Molecular weight | Properties <sup>1</sup><br>Is_Gas: true (for all)                                                                                                                                                |
|-------------------|------------------------------------------------------------------|------------------|--------------------------------------------------------------------------------------------------------------------------------------------------------------------------------------------------|
| BPINP             | C10H18O3/peroxide from BPIN                                      | 186.28           | DD_F0: 1.0<br>DD_Hstar: 1.0e+5<br>Henry_CR: 6039.0<br>Henry_K0: 1.0e+5<br>Is_Advected: true<br>Is_DryDep: true<br>Is_Gas: true<br>Is_WetDep: true<br>WD_RetFactor: 2.0e-2                        |
| BPINOOH           | C9H14O3/2 <sup>nd</sup> gen peroxide from BPIN                   | 186.28           | DD_F0: 1.0<br>DD_Hstar: 1.0e+5<br>Henry_CR: 6039.0<br>Henry_K0: 1.0e+5<br>Is_Advected: true<br>Is_DryDep: true<br>Is_Gas: true<br>Is_WetDep: true<br>WD_RetFactor: 2.0e-2                        |
| BIPINON           | C9H13NO4/saturated 2 <sup>nd</sup> gen BPIN organic nitrate      | 215.28           | DD_F0: 1.0<br>DD_Hstar: 2.0e+6<br>Henry_CR: 9200.0<br>Henry_K0: 1.7e+4<br>Is_Advected: true<br>Is_DryDep: true<br>Is_Gas: true<br>Is_Photolysis: true<br>Is_WetDep: true<br>WD_RetFactor: 2.0e-2 |
| LIMAL             | C10H16O2/aldehyde from limonene                                  | 186.28           | DD_F0: 1.0<br>DD_Hstar: 1.0e+3<br>Henry_CR: 6039.0<br>Henry_K0: 1.0e+3<br>Is_Advected: true<br>Is_DryDep: true<br>Is_Gas: true<br>Is_WetDep: true<br>WD_RetFactor: 2.0e-2                        |
| LIMN              | C10H17NO4/saturated 1 <sup>st</sup> gen limonene organic nitrate | 215.28           | DD_F0: 1.0<br>DD_Hstar: 2.0e+6<br>Henry_CR: 9200.0<br>Henry_K0: 1.7e+4<br>Is_Advected: true<br>Is_DryDep: true<br>Is_Gas: true<br>Is_Photolysis: true<br>Is_WetDep: true<br>WD_RetFactor: 2.0e-2 |
| LIMKET            | C10H16O2/ketone from limonene                                    | 186.28           | DD_F0: 1.0<br>DD_Hstar: 1.0e+3<br>Henry_CR: 6039.0<br>Henry_K0: 1.0e+3<br>Is_Advected: true<br>Is_DryDep: true<br>Is_Gas: true<br>Is_WetDep: true<br>WD_RetFactor: 2.0e-2                        |
| LIMKB             | C10H16O3/2 <sup>nd</sup> gen ketone from limonene                |                  | DD_F0: 1.0<br>DD_Hstar: 1.0e+3                                                                                                                                                                   |

| GEOS-Chem Species | Formula/Name                                                        | Molecular weight | Properties <sup>1</sup>                                                                                                                                                                          |
|-------------------|---------------------------------------------------------------------|------------------|--------------------------------------------------------------------------------------------------------------------------------------------------------------------------------------------------|
|                   |                                                                     |                  | Is_Gas: true (for all)<br>Henry_CR: 6039.0<br>Henry_K0: 1.0e+3<br>Is_Advected: true<br>Is_DryDep: true<br>Is_Gas: true<br>Is_WetDep: true<br>MW_g: 186.28<br>WD_RetFactor: 2.0e-2                |
| LIMNB             | C10H15NO4/saturated 1 <sup>st</sup> gen LIMO organic nitrate        | 215.28           | DD_F0: 1.0<br>DD_Hstar: 2.0e+6<br>Henry_CR: 9200.0<br>Henry_K0: 1.7e+4<br>Is_Advected: true<br>Is_DryDep: true<br>Is_Gas: true<br>Is_Photolysis: true<br>Is_WetDep: true<br>WD_RetFactor: 2.0e-2 |
| LIMO2H            | C10H18O3/acid from LIMO                                             | 186.28           | DD_F0: 1.0<br>DD_Hstar: 3.14e+5<br>Henry_CR: 6039.0<br>Henry_K0: 3.14e+5<br>Is_Advected: true<br>Is_DryDep: true<br>Is_Gas: true<br>Is_WetDep: true<br>WD_RetFactor: 2.0e-2                      |
| LIMO3H            | C10H18O4/peracid from LIMO                                          | 186.28           | DD_F0: 1.0<br>DD_Hstar: 1.0e+5<br>Henry_CR: 6039.0<br>Henry_K0: 1.0e+5<br>Is_Advected: true<br>Is_DryDep: true<br>Is_Gas: true<br>Is_WetDep: true<br>WD_RetFactor: 2.0e-2                        |
| MYRCO             | C10H18O3/aldehyde or ketone from myrcene                            | 186.28           | DD_F0: 1.0<br>DD_Hstar: 1.0e+3<br>Henry_CR: 6039.0<br>Henry_K0: 1.0e+3<br>Is_Advected: true<br>Is_DryDep: true<br>Is_Gas: true<br>Is_WetDep: true<br>WD_RetFactor: 2.0e-2                        |
| PIN               | C10H17NO4/saturated 1 <sup>st</sup> gen monoterpene organic nitrate | 215.28           | DD_F0: 1.0<br>DD_Hstar: 2.0e+6<br>Henry_CR: 9200.0<br>Henry_K0: 1.7e+4<br>Is_Advected: true<br>Is_DryDep: true<br>Is_Gas: true<br>Is_Photolysis: true<br>Is_WetDep: true<br>WD_RetFactor: 2.0e-2 |
| APINO2            | C10H17O3/peroxy radical from APIN                                   | 185.27           | N/A                                                                                                                                                                                              |

| GEOS-Chem Species | Formula/Name                                          | Molecular weight | Properties <sup>1</sup><br>Is_Gas: true (for all)                                                                                                                                                |
|-------------------|-------------------------------------------------------|------------------|--------------------------------------------------------------------------------------------------------------------------------------------------------------------------------------------------|
| PINO3             | C10H17O3/acylperoxy radical from APIN                 | 185.27           | N/A                                                                                                                                                                                              |
| C96O2             | C10H17O3/2 <sup>nd</sup> gen peroxy radical from APIN | 185.27           | N/A                                                                                                                                                                                              |
| BPINO2            | C10H17O3/peroxy radical from BPIN                     | 185.27           | N/A                                                                                                                                                                                              |
| BPINOO2           | C10H17O3/2 <sup>nd</sup> gen peroxy radical from BPIN | 185.27           | N/A                                                                                                                                                                                              |
| LIMKO2            | C10H17O3/ 2 <sup>nd</sup> gen peroxy radical from     | 185.27           | N/A                                                                                                                                                                                              |
| LIMO3             | C10H17O3/acylperoxy radical from LIMO                 | 185.27           | N/A                                                                                                                                                                                              |
| PINPAN            | 215.28/ $\alpha$ -Pinonyl peroxy nitrate              | C10H17NO4        | DD_F0: 1.0<br>DD_Hstar: 2.0e+6<br>Henry_CR: 9200.0<br>Henry_K0: 1.7e+4<br>Is_Advected: true<br>Is_DryDep: true<br>Is_Gas: true<br>Is_Photolysis: true<br>Is_WetDep: true<br>WD_RetFactor: 2.0e-2 |
| LIMPAN            | C10H17NO4/Limononyl peroxy nitrate                    | 215.28           | DD_F0: 1.0<br>DD_Hstar: 2.0e+6<br>Henry_CR: 9200.0<br>Henry_K0: 1.7e+4<br>Is_Advected: true<br>Is_DryDep: true<br>Is_Gas: true<br>Is_Photolysis: true<br>Is_WetDep: true<br>WD_RetFactor: 2.0e-2 |

<sup>1</sup>DD\_Hstar (M atm<sup>-1</sup>, T=298.15, pH=7). Henry\_K0 = M atm<sup>-1</sup>, T=298.15, pH=4.5). Henry\_K0 = DD\_Hstar\*(1+H<sup>+</sup>/K<sub>a</sub>). Where possible, DD\_Hstar from <http://www.henrys-law.org>, and adjusted for pH using K<sub>a</sub> from <https://acp.copernicus.org/articles/21/13483/2021/>.

**Table S2. New reactions added to GEOS-Chem.**

| Reaction                                                                 | Rate                  | Reference |
|--------------------------------------------------------------------------|-----------------------|-----------|
| <b>New Peroxynitrates (precursor)</b>                                    |                       |           |
| <b>PHAN (glycoaldehyde)</b>                                              |                       |           |
| GLYC + OH = 0.200GLYX + 0.200HO2 + 0.800GCO3                             | 1E-11                 | MCMV3.3.1 |
| GLYC + NO3 = GCO3 + HNO3                                                 | 1.44E-12*exp(-1862/T) | MCMV3.3.1 |
| GCO3 + NO2 {+M} = PHAN                                                   | Same as PAN           | MCMV3.3.1 |
| GCO3 + NO = NO2 + HO2 + CH2O                                             | 7.5E-12*exp(290/T)    | MCMV3.3.1 |
| GCO3 + HO2 = 0.44HO2 + 0.44CH2O + 0.44OH + 0.560HACTA + 0.15O3 + 0.44CO2 | 5.2E-13*exp(980/T)    | MCMV3.3.1 |



|                                                                                 |                        |                                            |
|---------------------------------------------------------------------------------|------------------------|--------------------------------------------|
| GCO3 + NO3 = CH2O + HO2 + NO2                                                   | 4E-12                  | MCMV3.3.1                                  |
| HACTA + OH = CH2O + HO2                                                         | 2.73E-12               | MCMV3.3.1                                  |
| PHAN = GCO3 + NO2                                                               | Same as PAN            | MCMV3.3.1                                  |
| PHAN + OH = CH2O + CO + NO2                                                     | 1.12E-12               | MCMV3.3.1                                  |
| <b>AROMPN (aromatics)</b>                                                       |                        |                                            |
| TLFUONE + OH → TLFO2                                                            | 6.9E-11                | MCMV3.3.1                                  |
| TLFO2 + NO = NO2 + HO2 + AROMCHO                                                | 2.70E-12*exp(360/T)    | MCMV3.3.1                                  |
| TLFO2 + HO2 = AROMCHO                                                           | 2.05E-13*exp(1300/T)   | MCMV3.3.1                                  |
| AROMCHO + OH → AROMCO3                                                          | 7.09E-11               | MCMV3.3.1                                  |
| AROMCHO + jv <sup>l</sup> → HO2 + CO + MCO3 + CH2O                              | Same as RCHO           | MCMV3.3.1                                  |
| AROMCO3 + NO2 {+M} → AROMPN                                                     | same as BZPAN          | MCMV3.3.1                                  |
| AROMCO3 + NO → NO2 + RCO3 + 2CO2                                                | 7.5E-12*EXP(290/T)     | MCMV3.3.1                                  |
| AROMCO3 + HO2 = 0.15O3 + 0.15RCOOH + 0.44CO2 + 0.44OH + 0.44RCO3 + 0.41RP       | 5.2e-13*exp(980/T)     | MCMV3.3.1 for rate, estimated products     |
| AROMPN = AROMCO3 + NO2                                                          | same as BZPAN          |                                            |
| AROMPN + OH = 2CO + NO2 + MCO3 + HCHO                                           | 1E-14                  | MCMV3.3.1 for ACCOME PAN                   |
| <b>MEKPN (MEK)</b>                                                              |                        |                                            |
| MEK + OH = KO2                                                                  | 1.30E-12*exp(-25.0/T)  | currently in GEOS-Chem                     |
| KO2 + NO = 0.070R4N2 + 0.930 NO2 + 0.62ALD2 + 0.62MCO3 + 0.31MEKCO3 + 0.31CH2O  | same rate as GEOS-Chem | branching for A vs. B from Cox et al, 1981 |
| MEKCO3 + NO2 {+M} → MEKPN                                                       | Same as PAN            | C3PAN1 from MCMV3.3.1                      |
| MEKCO3 + NO = NO2 + ETOO + CO2                                                  | 7.5E-12*exp(290/T)     | MCMV3.3.1                                  |
| MEKCO3 + HO2 = 0.15O3 + 0.15RCOOH + 0.44CO2 + 0.44OH + 0.44ETOO + 0.41RP        | 5.2e-13*exp(980/T) ;   | MCMV3.3.1 for rate, estimated products     |
| MEKPN = MEKCO3 + NO2                                                            | Same as PAN            |                                            |
| MEKPN + OH = GLYC + CO + NO2                                                    | 4.51E-12               | MCMV3.3.1                                  |
| <b>APAN (1,3 butadiene)</b>                                                     |                        |                                            |
| C4H6 + OH = BUTO2                                                               | 1.48E-11*exp(448/T)    | MCMV3.3.1                                  |
| C4H6 + NO3 = ACR + HCHO + NO2                                                   | 1.03E-13               |                                            |
| C4H6 + O3 = ACR + HCHO                                                          | 1.34E-14*exp(-2283/T)  |                                            |
| BUTO2 + HO2 = 0.659GLYC + 0.894RCHO                                             | 1.82E-13*exp(1300/T)   | MCMV3.3.1                                  |
| BUTO2 + NO = 0.058BUTN + 0.730ACR + 0.603CH2O + 0.513HO2 + 0.942NO2 + 0.326RCHO | 2.70E-12*exp(360/T)    | MCMV3.3.1 – all pathways                   |
| BUTN + OH = GLYC + NO2 + CH2O + HO2 + CO                                        | 3.59E-11               | MCMV3.3.1                                  |
| ACR + OH = 0.680ACO3 + 0.255ACRO2 + 0.065CH2O + 0.065GLYX + 0.425HO2            | 2.0E-11                | MCMV3.3.1                                  |
| ACRO2 + NO = GLYC + NO2 + HO2 + CO                                              | 2.7E-12*exp(360/T)     | MCMV3.3.1                                  |
| ACRO2 + HO2 = GLYC + HO2 + CO                                                   | 1.51E-13*exp(1300/T)   | MCMV3.3.1                                  |
| ACO3 + HO2 = CO + CH2O + 0.500GLYC + 0.250HO2 + 0.250OH                         | 5.2E-13*exp(980/T)     | MCMV3.3.1                                  |
| ACO3 + NO = HO2 + CO + CH2O + NO2                                               | 7.5E-12*exp(290/T)     | MCMV3.3.1                                  |
| ACO3 + NO2 {+M} = APAN                                                          | Same as for PAN        | MCMV3.3.1                                  |
| APAN = ACO3 + NO2                                                               | Same as for PAN        | MCMV3.3.1                                  |
| APAN + OH = GLYC + CO + NO3                                                     | 1.47E-11               | MCMV3.3.1                                  |
| ACR + jv <sup>l</sup> = 0.3ACO3 + 0.4C2H4 + 0.7CO + 0.3HCHO + 0.3HO2            | Same as MACR           | MCMV3.3.1                                  |
| APAN + jv <sup>l</sup> = ACO3 + NO2                                             | Same as for PAN        | MCMV3.3.1                                  |
| <b>New Alkyl nitrates</b>                                                       |                        |                                            |

| <b>Aromatic Nitrates from TOLU, XYLE, EBZ, TMB</b>                                                                                                                                                    |                                |                                                                                    |
|-------------------------------------------------------------------------------------------------------------------------------------------------------------------------------------------------------|--------------------------------|------------------------------------------------------------------------------------|
| TOLU + OH = TRO2 + 0.19CSL + 0.19HO2 + 0.81AROMRO2 + 0.75AROMRO2 + 0.06BALD + 0.06ZRO2 + 0.12GLYX + 0.12MGLY + 0.27CO + 0.04MVK + 0.3AROMP5 + 0.18AROMP5 + 0.12TLFUONE + 0.68AROMP4                   | 1.8E-12*exp(340/T)             | Modified from Bates et al., 2021                                                   |
| XYLE + OH = XRO2 + 0.15CSL + 0.15HO2 + 0.85AROMRO2 + 0.79AROMRO2 + 0.06BALD + 0.06ZRO2 + 0.1GLYX + 0.2MGLY + 0.3CO + 0.04MVK + 0.56AROMP5 + 0.39AROMP5 + 0.17TLFUONE + 0.28AROMP4 + 0.45RCOOH :       | 1.7E-11                        | Modified from Bates et al., 2021                                                   |
| EBZ + OH = 0.820AROMRO2 + 0.813AROMRO2 + 0.250CH2O + 0.07BALD + 0.07ZRO2 + 0.180CSL + 0.400ALD2 + 0.400AROMP5 + 0.800AROMP4 + 0.180HO2                                                                | 7E-12                          | Modified from Bates et al., 2021                                                   |
| TMB + OH = 0.970AROMRO2 + 0.930AROMRO2 + 0.120CH2O + 0.05BALD + 0.05ZRO2 + 0.030CSL + 0.750AROMP5 + 0.600AROMP5 + 0.15TLFUONE + 0.375AROMP4 + 0.250MGLY + 0.100GLYX + 0.500RCOOH + 0.120CO + 0.030HO2 | 3.92E-11                       | Modified from Bates et al., 2021                                                   |
| ZRO2 + NO = 0.11RNO3 + 0.89BALD + 0.89NO2 + HO2                                                                                                                                                       | 2.7E-12*exp(360/T)             | MCMV3.3.1 (from TLBIPERO2) making RNO                                              |
| ZRO2 + HO2 = BALD + OH                                                                                                                                                                                | 1.5E-13*exp(1310/T)            | MCMV3.3.1                                                                          |
| RNO3 + OH = BALD + NO2 + HO2                                                                                                                                                                          | 7.16E-11                       | MCMV3.3.1                                                                          |
| RNO3 + jv <sup>l</sup> = BALD + NO2 + HO2?                                                                                                                                                            | Same as R4N2                   |                                                                                    |
| <b>ALK6 mechanism</b>                                                                                                                                                                                 |                                |                                                                                    |
| ALK6 + OH = R6O2 + H2O                                                                                                                                                                                | 2.00E-11*exp(-359/T)           | Lurmann et al., 1986                                                               |
| R6O2 + NO = 0.750RCHO + 0.250R4O2 + 0.250MEK + 0.750HO2                                                                                                                                               | GC_RO2NO_B2_aca(2.7E-12,350,7) | Lurmann et al., 1986<br>Adjust nitrate yield for weighted avg. of observed >C6 ANs |
| R6O2 + NO = R6N2                                                                                                                                                                                      | GC_RO2NO_A2_aca(2.7E-12,350,7) | Lurmann et al., 1986                                                               |
| ALK6 + NO3 = HNO3 + R6O2                                                                                                                                                                              | 6.0E-17                        | Lurmann et al., 1986                                                               |
| R6N2 + OH = R6N1 + H2O                                                                                                                                                                                | 4.00E-12                       | Lurmann et al., 1986                                                               |
| R6N2 + jv <sup>l</sup> = NO2 + 0.348ALD2 + 1.558RCHO + 0.326MCO3 + 0.326RCO3 + 0.326HO2                                                                                                               | Same as R4N2                   | Lurmann et al., 1986                                                               |
| R6N1 + NO = 2.00NO2 + 1.240RCHO + 0.650ALD2 + 0.980CH2O                                                                                                                                               | 4.20E-12*exp(180.0/T)          | Lurmann et al., 1986                                                               |
| R6O2 + HO2 = R6P                                                                                                                                                                                      | 3.00E-12                       | Lurmann et al., 1986                                                               |
| OH + R6P = 0.500R6O2 + 0.500RCHO + 0.500OH                                                                                                                                                            | 1.00E-11                       |                                                                                    |
| R6N1 + HO2 = R6N2                                                                                                                                                                                     | GCARR(7.4E-13, 700)            | Lurmann et al., 1986                                                               |
| <b>Styrene (C8H8) mechanism</b>                                                                                                                                                                       |                                |                                                                                    |
| STYR + NO3 = AROMRO2 + NO2 + CH2O + BALD                                                                                                                                                              | 1.5E-12                        | Bates et al., 2021                                                                 |
| STYR + OH = 0.7AROMRO2 + 0.7HO2 + CH2O + 0.7BALD + 0.3ZRO2                                                                                                                                            | 5.8E-11                        | Bates et al., 2021                                                                 |

|                                                                                                               |                         |                               |
|---------------------------------------------------------------------------------------------------------------|-------------------------|-------------------------------|
| STYR+ O3 = 0.5SCI + 0.5CH2O + 0.62BALD + 0.1BENZ + 0.28BENZO2 + 0.18CO + 0.18OH + 0.1HO2                      | 1.7E-17                 | Bates et al., 2021            |
| <b>Other new chemistry</b>                                                                                    |                         |                               |
| <b>RCOOH (&gt;C2 organic acids) chemistry</b>                                                                 |                         |                               |
| RCOOH + OH = ETO2 + CO2 + H2O                                                                                 | 1.2E-12                 | Propionic acid from MCMV3.3.1 |
| <b>Monoterpene chemistry</b>                                                                                  |                         |                               |
| LIMO + OH = LIMO2                                                                                             | 4.20E-11*exp(401.0/T)   | Modified from MCMV3.3.1       |
| LIMO + O3 = 0.865OH + 0.15CO + 0.15AROMRO2 + 0.27LIMAL + 0.715LIMO3                                           | 2.95E-15*exp(-783.0/T)  | Modified from MCMV3.3.1       |
| MTPO + OH = 0.15APINO2 + 0.15BPINO2 + 0.2LIMO2 + 0.5PIO2                                                      | 1.21E-11*exp(440.0/T)   | Modified from MCMV3.3.1       |
| MTPO + O3 = 0.5ACET + 0.8OH + 0.1CH2O + 0.5MEK + 0.15MVK + 0.4MYRCO + 0.5AROMRO2 + 0.05HO2 + 0.3KO2 + 0.3RCHO | 2.7E-15*exp(-520.0/T)   | Modified from MCMV3.3.1       |
| MTPA + OH = 0.075LIMO2 + 0.67APINO2 + 0.255BPINO2                                                             | 1.34E-11*exp( 410.0/T)  | Modified from MCMV3.3.1       |
| MTPA + O3 = 0.65OH + 0.5APINO2 + 0.1BPINO2 + 0.2BPINO + 0.2PINAL + 0.1CH2OO + 0.1CO + 0.1CH2O                 | 8.22E-16*exp( -640.0/T) | Modified from MCMV3.3.1       |
| APINO2 + HO2 = APINP                                                                                          | 2.66E-13*exp(1300.0/T)  | Modified from MCMV3.3.1       |
| APINO2 + NO = 0.25APINN + 0.75PINAL + 0.75NO2 + 0.75HO2                                                       | 2.7E-12*exp(360.0/T)    | Modified from MCMV3.3.1       |
| APINO2 + NO3 = PINAL + NO2 + HO2                                                                              | 2.3E-12                 | Modified from MCMV3.3.1       |
| APINP + OH = 0.4PINO3 + 0.6APINO2                                                                             | 1.83E-11                | Modified from MCMV3.3.1       |
| APINN + OH = 0.5PINAL + 0.5NO2 + 0.5HO2 + 0.5C96N + 0.5CH2O + 0.5AROMRO2                                      | 5.50E-12                | Modified from MCMV3.3.1       |
| PINAL + NO3 = HNO3 + PINO3                                                                                    | 2.0E-14                 | Modified from MCMV3.3.1       |
| PINAL + OH = PINO3                                                                                            | 5.2E-12*exp(600.0/T)    | Modified from MCMV3.3.1       |
| PINO3 + HO2 = 0.44OH + 0.15O3 + 0.44C96O2 + 0.41PINO3H + 0.15PINONIC                                          | 2.66E-13*exp(1300.0/T)  | Modified from MCMV3.3.1       |
| PINO3 + NO3 = NO2 + CO2 + C96O2                                                                               | 2.3E-12                 | Modified from MCMV3.3.1       |
| PINO3H + OH = PINO3                                                                                           | 9.73E-12                | Modified from MCMV3.3.1       |
| PINONIC + OH = CO2 + C96O2                                                                                    | 6.65E-12                | Modified from MCMV3.3.1       |
| C96O2 + HO2 = C96O2H                                                                                          | 2.66E-13*exp(1300.0/T)  | Modified from MCMV3.3.1       |
| C96O2 + NO = 0.16C96N + 0.84NO2 + 0.84AROMRO2 + 0.84ACET + 0.84CH2O + 0.84RCO3 + 0.42MEK                      | 2.7E-12*exp(360.0/T)    | Modified from MCMV3.3.1       |
| C96O2 + NO3 = NO2 + AROMRO2 + ACET + CH2O + RCO3 + 0.5MEK                                                     | 2.3E-12                 | Modified from MCMV3.3.1       |
| C96O2 + MO2 = HO2 + 0.75CH2O + 0.25MOH + 0.25C96O2H + 0.75AROMRO2 + 0.75ACET + 0.75CH2O + 0.75RCO3 + 0.375MEK | 3.75E-13*exp(500.0/T)   | Modified from MCMV3.3.1       |
| C96O2H + OH = 0.5C96O2 + 0.5AROMRO2 + 0.5ACET + 0.5CH2O + 0.5RCO3 + 0.25MEK                                   | 2.6E-11                 | Modified from MCMV3.3.1       |
| C96N + OH = 0.5NO2 + 0.5MONITS + 0.55AROMRO2 + 0.4ACET + 0.4CH2O + 0.4RCO3 + 0.3MEK                           | 2.88E-12                | Modified from MCMV3.3.1       |

|                                                                                                  |                         |                         |
|--------------------------------------------------------------------------------------------------|-------------------------|-------------------------|
| BPINO2 + HO2 = BPINP                                                                             | 2.66E-13*exp(1300.0/T)  | Modified from MCMV3.3.1 |
| BPINO2 + NO = 0.25BPINN + 0.75CH2O + 0.75NO2 + 0.75HO2 + 0.75BPINO                               | 2.7E-12*exp(360.0/T)    | Modified from MCMV3.3.1 |
| BPINO2 + NO3 = CH2O + NO2 + HO2 + BPINO                                                          | 2.3E-12                 | Modified from MCMV3.3.1 |
| BPINN + OH = 0.5BPINON + 0.5AROMRO2 + CH2O + 0.5NO2 + 0.5HO2 + 0.5BPINO                          | 4.7E-12                 | Modified from MCMV3.3.1 |
| BPINP + OH = BPINO2                                                                              | 1.33E-11                | Modified from MCMV3.3.1 |
| BPINO + OH = BPINOO2                                                                             | 1.55E-11                | Modified from MCMV3.3.1 |
| BPINOO2 + HO2 = BPINOOH                                                                          | 2.66E-13*exp(1300.0/T)  | Modified from MCMV3.3.1 |
| BPINOO2 + NO = BPINON                                                                            | 4.32E-13*exp(360.0/T)   | Modified from MCMV3.3.1 |
| BPINOO2 + NO = NO2 + HO2 + 0.27LIMO3 + 0.6ACET + 0.6RCHO + 0.6R4O2                               | 2.27E-12*exp(360.0/T)   | Modified from MCMV3.3.1 |
| BPINOO2 + MO2 = HO2 + 0.23LIMO3 + 0.4ACET + 0.4RCHO + 0.4R4O2 + 0.75CH2O + 0.25MOH + 0.25BPINOOH | 3.75E-13*exp(500.0/T)   | Modified from MCMV3.3.1 |
| BPINOO2 + NO3 = NO2 + HO2 + 0.27LIMO3 + 0.6ACET + 0.6RCHO + 0.6R4O2                              | 2.3E-12                 | Modified from MCMV3.3.1 |
| BPINOOH + OH = BPINOO2                                                                           | 8.59E-11                | Modified from MCMV3.3.1 |
| BPINON + OH = 0.5MONITS + 0.5NO2 + 0.085LIMO3 + 0.3ACET + 0.3RCHO + 0.3R4O2                      | 3.24E-12                | Modified from MCMV3.3.1 |
| LIMO2 + HO2 = 0.37LIMKET + 0.63LIMAL                                                             | 2.66E-13*exp(1300.0/T)  | Modified from MCMV3.3.1 |
| LIMO2 + NO = 0.25LIMN + 0.75NO2 + 0.75HO2 + 0.28LIMKET + 0.47LIMAL                               | 2.7E-12*exp(360.0/T)    | Modified from MCMV3.3.1 |
| LIMO2 + NO3 = NO2 + HO2 + 0.37LIMKET + 0.63LIMAL                                                 | 2.3E-12                 | Modified from MCMV3.3.1 |
| LIMAL + OH = LIMO3                                                                               | 1.1E-10                 | Modified from MCMV3.3.1 |
| LIMAL + O3 = 0.3LIMKB + 0.33CH2OO + 0.67CH2O + 0.6LIMO3 + 0.6OH                                  | 8.3E-18                 | Modified from MCMV3.3.1 |
| LIMAL + NO3 = AROMRO2 + LIMNB                                                                    | 2.6E-13                 | Modified from MCMV3.3.1 |
| LIMKET + OH = LIMKO2                                                                             | 9.97E-11                | Modified from MCMV3.3.1 |
| LIMKET + O3 = 0.27LIMKO2 + 0.865OH + 0.73LIMO3                                                   | 1.5E-16                 | Modified from MCMV3.3.1 |
| LIMKET + NO3 = LIMNB + AROMRO2                                                                   | 9.4E-12                 | Modified from MCMV3.3.1 |
| LIMN + OH = 0.5LIMNB + 0.32LIMO3 + 0.18LIMKO2 + 0.5NO2                                           | 1.1E-10                 | Modified from MCMV3.3.1 |
| LIMN + O3 = CH2O + 0.5NO2 + 0.4LIMO3 + 0.5LIMNB                                                  | 8.3E-18                 | Modified from MCMV3.3.1 |
| LIMN + NO3 = NO2 + LIMNB + AROMRO2                                                               | 2.6E-13                 | Modified from MCMV3.3.1 |
| LIMKO2 + NO = 0.16LIMNB + 0.84NO2 + 0.84LIMKB + 0.84HO2                                          | 2.7E-12*exp(360.0/T)    | Modified from MCMV3.3.1 |
| LIMKO2 + HO2 = LIMO3H                                                                            | 2.66E-13*exp(1300.0/T)  | Modified from MCMV3.3.1 |
| LIMKO2 + NO3 = NO2 + LIMKB + HO2                                                                 | 2.3E-12                 | Modified from MCMV3.3.1 |
| LIMKO2 + MO2 = 0.75LIMKB + 0.25LIMO3H + 0.75CH2O + 0.25MOH + HO2                                 | 3.75E-13*exp(500.0/T)   | Modified from MCMV3.3.1 |
| LIMKB + OH = LIMO3                                                                               | 3.6E-11                 | Modified from MCMV3.3.1 |
| LIMKB + NO3 = NO2 + LIMO3                                                                        | 1.22E-11*exp(-1862.0/T) | Modified from MCMV3.3.1 |
| LIMNB + OH = 0.5MONITS + 0.5NO2 + 0.5LIMO3                                                       | 6.3E-12                 | Modified from MCMV3.3.1 |

|                                                                                                                                       |                        |                         |
|---------------------------------------------------------------------------------------------------------------------------------------|------------------------|-------------------------|
| LIMO3 + HO2 = 0.44OH + 0.15O3 + 0.44CO2 + 0.44MCO3 + 0.44RCHO + 0.176CH2O + 0.352R4O2 + 0.41LIMO3H + 0.15LIMO2H                       | 2.66E-13*exp(1300.0/T) | Modified from MCMV3.3.1 |
| LIMO3 + NO = NO2 + CO2 + MCO3 + RCHO + 0.4CH2O + 0.8R4O2                                                                              | 2.7E-12*exp(360.0/T)   | Modified from MCMV3.3.1 |
| LIMO3 + NO3 = NO2 + CO2 + MCO3 + RCHO + 0.4CH2O + 0.8R4O2                                                                             | 2.3E-12                | Modified from MCMV3.3.1 |
| LIMO3H + OH = LIMO3                                                                                                                   | 9.73E-12               | Modified from MCMV3.3.1 |
| LIMO2H + OH = CO2 + MCO3 + RCHO + 0.4CH2O + 0.8R4O2                                                                                   | 6.65E-12               | Modified from MCMV3.3.1 |
| PIO2 + HO2 = PIP                                                                                                                      | 2.66E-13*exp(1300.0/T) | Modified from MCMV3.3.1 |
| PIO2 + NO = PIN                                                                                                                       | 6.75E-13*exp(360.0/T)  | Modified from MCMV3.3.1 |
| PIO2 + NO = NO2 + HO2 + 0.45MVK + 0.45ACET + 0.1CH2O + 0.675MYRCO                                                                     | 2.03E-12*exp(360.0/T)  | Modified from MCMV3.3.1 |
| PIO2 + NO3 = NO2 + HO2 + 0.45MVK + 0.45ACET + 0.1CH2O + 0.675MYRCO                                                                    | 2.3E-12                | Modified from MCMV3.3.1 |
| PIP + OH = 0.3OH + 0.7AROMRO2 + 0.3MVK + 0.3ACET + 0.1CH2O + 0.78MYRCO                                                                | 6.05E-12*exp(440.0/T)  | Modified from MCMV3.3.1 |
| PIP + O3 = 0.3OH + 0.7AROMRO2 + 0.3MVK + 0.3ACET + 0.1CH2O + 0.78MYRCO                                                                | 1.35E-15*exp(-520.0/T) | Modified from MCMV3.3.1 |
| PIP + NO3 = 0.5OLNN + 0.5NO2 + 0.15OH + 0.35AROMRO2 + 0.15MVK + 0.15ACET + 0.05CH2O + 0.39MYRCO                                       | 1.06E-12*exp(490.0/T)  | Modified from MCMV3.3.1 |
| PIN + OH = 0.7AROMRO2 + 0.7MONITU + 0.3NO2 + 0.3MYRCO                                                                                 | 6.05E-12*exp(440.0/T)  | Modified from MCMV3.3.1 |
| PIN + O3 = 0.7AROMRO2 + 0.7MONITU + 0.3NO2 + 0.3MYRCO                                                                                 | 1.35E-15*exp(-520.0/T) | Modified from MCMV3.3.1 |
| PIN + NO3 = 0.5OLNN + 1.15NO2 + 0.35AROMRO2 + 0.35MONITU + 0.15MYRCO                                                                  | 1.06E-12*exp(490.0/T)  | Modified from MCMV3.3.1 |
| MYRCO + OH = HO2 + AROMRO2 + 1.5CH2O + MEK + 0.5ACET + 0.5MVK + 0.5GLYC                                                               | 6.05E-12*exp(440.0/T)  | Modified from MCMV3.3.1 |
| MYRCO + O3 = OH + AROMRO2 + 1.5CH2O + MEK + 0.5ACET + 0.5MVK + 0.5GLYC                                                                | 1.35E-15*exp(-520.0/T) | Modified from MCMV3.3.1 |
| MYRCO + NO3 = 0.5OLNN + 0.5NO2 + 0.5HO2 + 0.5AROMRO2 + 0.75CH2O + 0.5MEK + 0.25ACET + 0.25MVK + 0.25GLYC                              | 1.06E-12*exp(490.0/T)  | Modified from MCMV3.3.1 |
| APINO2 + MO2 = PINAL + 1.75HO2 + 0.25MOH + 0.75CH2O 3.75E-13, 500.0<br>APINO2 + MCO3 = PINAL + HO2 + 0.1ACTA + 0.9CO2 + 0.9MO2        | 1.87E-12*exp(500.0/T)  | Modified from MCMV3.3.1 |
| BPINO2 + MO2 = 1.75HO2 + 0.25MOH + 1.75CH2O + BPINO 3.75E-13, 500.0<br>BPINO2 + MCO3 = BPINO + CH2O + HO2 + 0.1ACTA + 0.9CO2 + 0.9MO2 | 1.87E-12*exp(500.0/T)  | Modified from MCMV3.3.1 |
| LIMO2 + MO2 = 0.37LIMKET + 0.63LIMAL + 1.75HO2 + 0.25MOH + 0.75CH2O                                                                   | 3.75E-13*exp(500.0/T)  | Modified from MCMV3.3.1 |

|                                                                                               |                        |                         |
|-----------------------------------------------------------------------------------------------|------------------------|-------------------------|
| LIMO2 + MCO3 = 0.37LIMKET + 0.63LIMAL + HO2 + 0.1ACTA + 0.9CO2 + 0.9MO2                       | 1.87E-12*exp(500.0/T)  | Modified from MCMV3.3.1 |
| PIO2 + MO2 = 0.45MVK + 0.45ACET + 0.675MYRCO + 1.75HO2 + 0.25MOH + 0.85CH2O                   | 3.75E-13*exp(500.0/T)  | Modified from MCMV3.3.1 |
| PIO2 + MCO3 = 0.45MVK + 0.45ACET + 0.1CH2O + 0.675MYRCO + HO2 + 0.1ACTA + 0.9CO2 + 0.9MO2     | 1.87E-12*exp(500.0/T)  | Modified from MCMV3.3.1 |
| PINO3 + MO2 = CH2O + 0.75HO2 + 0.25PINONIC + 0.75C96O2 + 0.75CO2                              | 1.87E-12*exp(500.0/T)  | Modified from MCMV3.3.1 |
| PINO3 + MCO3 = C96O2 + 2CO2 + MO2                                                             | 3.75E-14*exp(500.0/T)  | Modified from MCMV3.3.1 |
| LIMO3 + MO2 = 0.75HO2 + CH2O + 0.75CO2 + 0.75MCO3 + 0.75RCHO + 0.3CH2O + 0.6R4O2 + 0.25LIMO2H | 1.87E-12*exp(500.0/T)  | Modified from MCMV3.3.1 |
| LIMO3 + MCO3 = CO2 + MO2 + MCO3 + RCHO + 0.4CH2O + 0.8R4O2                                    | 3.75E-14*exp(500.0/T)  | Modified from MCMV3.3.1 |
| APINP + hv = PINAL + OH + HO2                                                                 | use the same as CH3OOH | Modified from MCMV3.3.1 |
| PINAL + hv = CO + HO2 + C96O2                                                                 | use the same as ActAld | Modified from MCMV3.3.1 |
| PINO3H + hv = OH + CO2 + C96O2                                                                | use the same as CH3OOH | Modified from MCMV3.3.1 |
| PINONIC + hv = OH + CO2 + C96O2                                                               | use the same as MGLYX  | Modified from MCMV3.3.1 |
| C96O2H + hv = OH + AROMRO2 + ACET + CH2O + RCO3 + 0.5MEK                                      | use the same as CH3OOH | Modified from MCMV3.3.1 |
| BPINP + hv = OH + CH2O + HO2 + BPINO                                                          | use the same as CH3OOH | Modified from MCMV3.3.1 |
| BPINO3H + hv = OH + HO2 + 0.27LIMO3 + 0.6ACET + 0.6RCHO + 0.6R4O2 :                           | use the same as CH3OOH | Modified from MCMV3.3.1 |
| LIMO3H + hv = OH + CO2 + MCO3 + RCHO + 0.4CH2O + 0.8R4O2                                      | use the same as CH3OOH | Modified from MCMV3.3.1 |
| LIMO2H + hv = OH + CO2 + MCO3 + RCHO + 0.4CH2O + 0.8R4O2                                      | use the same as MGLYX  | Modified from MCMV3.3.1 |
| PIP + hv = OH + HO2 + 0.450MVK + 0.45ACET + 0.100CH2O + 0.675MYRCO                            | use the same as H2O2   | Modified from MCMV3.3.1 |
| LIMAL + hv = CO + HO2 + 0.900LIMO3                                                            | use the same as ActAld | Modified from MCMV3.3.1 |
| <b>Monoterpene PNs</b>                                                                        |                        |                         |
| LIMO3 + NO2 = LIMPAN                                                                          | Same as PAN            |                         |
| LIMPAN = LIMO3 + NO2                                                                          | Same as PAN            |                         |
| PINO3 + NO2 = PINPAN                                                                          | Same as PAN            |                         |
| PINPAN = PINO3 + NO2                                                                          | Same as PAN            |                         |

<sup>1</sup>jv is model j-value (photolysis frequency, s<sup>-1</sup>).

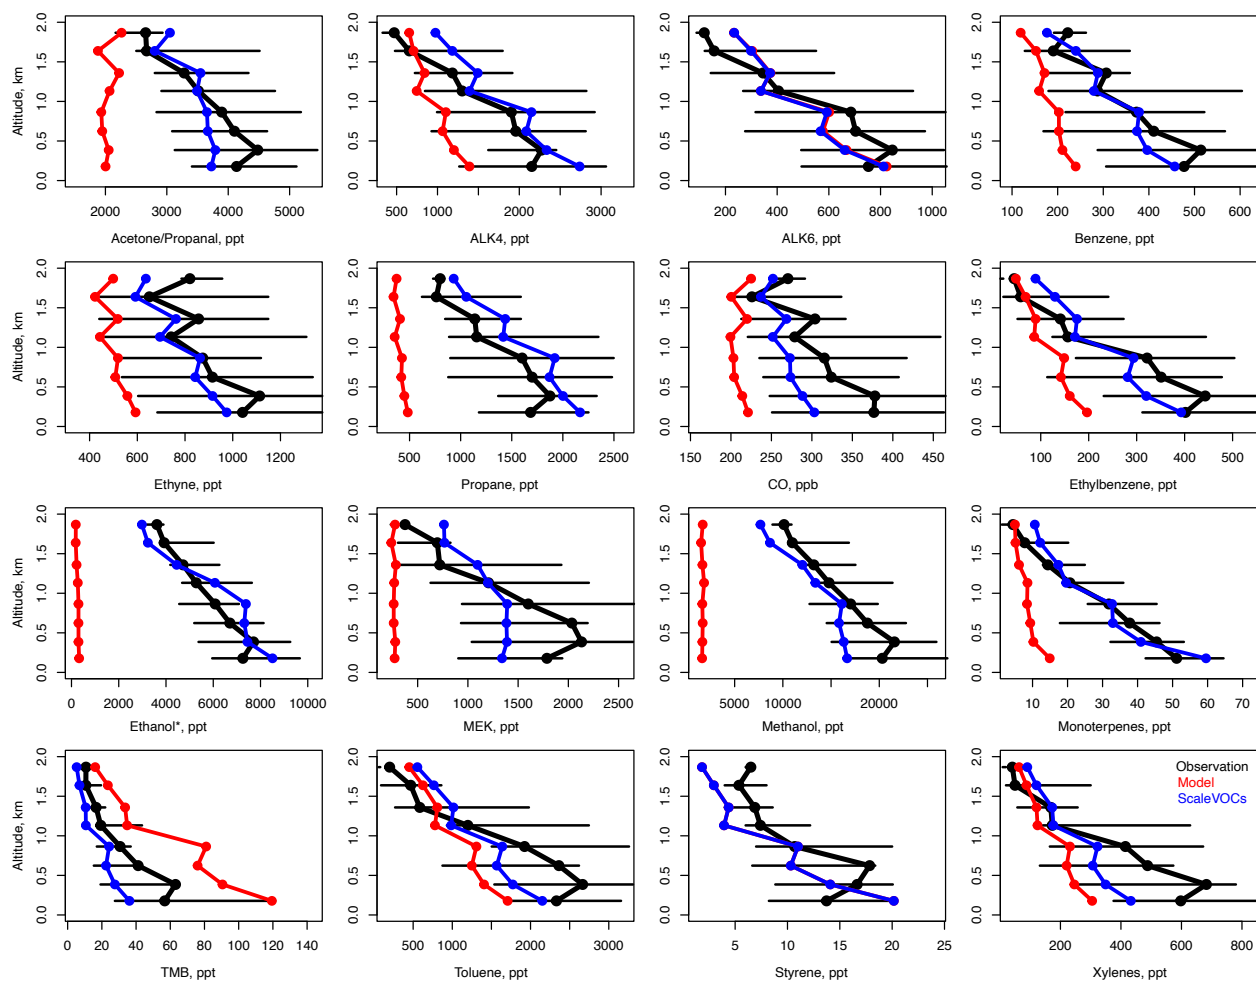

**Figure S1** – Mean vertical profiles in the SMA (domain of Fig. 1) of the base model (red) and the model with scaled VOCs (blue) against observations (black) for all species individually increased to better match observations.

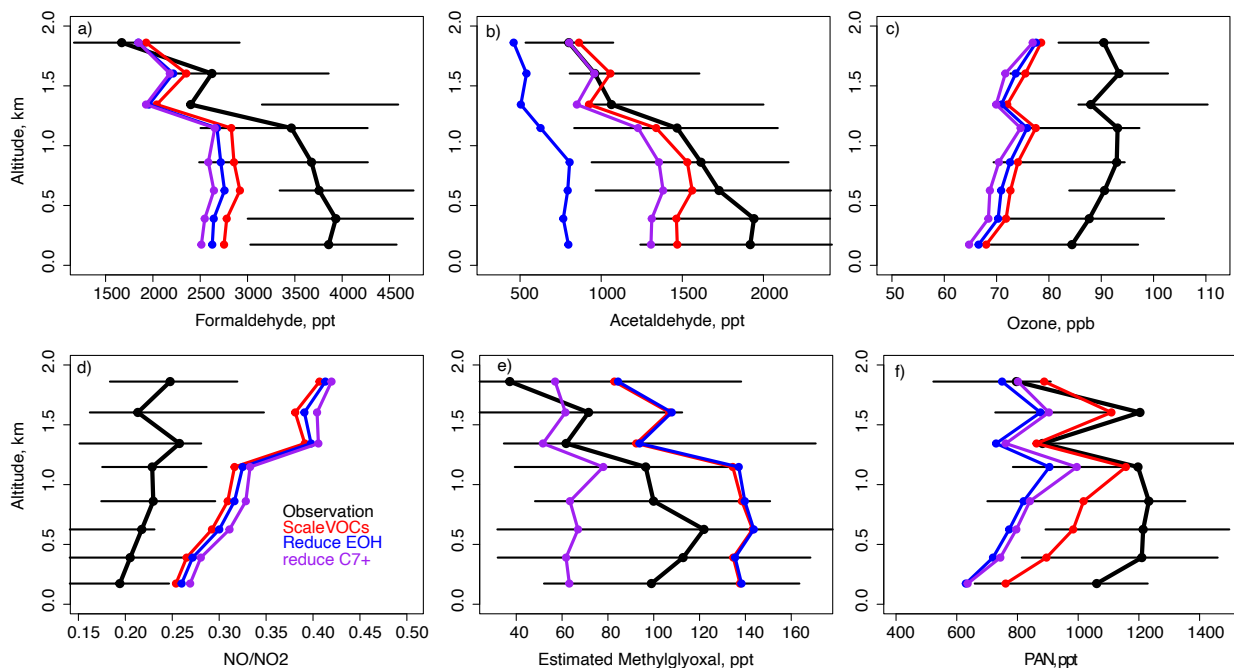

**Figure S2** – Mean vertical profiles in the SMA for a) formaldehyde, b) acetaldehyde, c) ozone, d) NO/NO<sub>2</sub>, e) estimated methylglyoxal, and f) PAN. Methylglyoxal is estimated as 67% of glyoxal observations based on the similar yield from toluene in GEOS-Chem but the 67% shorter lifetime. Model sensitivities are described in Sections 3 and 4 where “Reduce EOH” and “Reduce C7+” refer to the removal of scaled ethanol and C7+ aromatic emissions over South Korea, respectively.

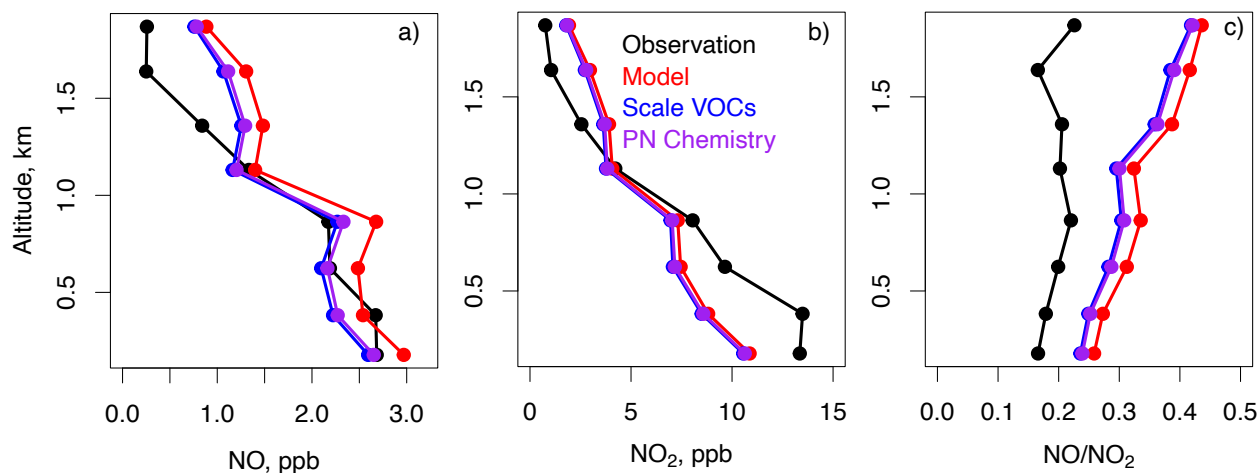

**Figure S3** – Mean vertical profiles in the SMA for a) NO, b) NO<sub>2</sub>, and c) NO/NO<sub>2</sub>. Model sensitivities are described in Section 4.

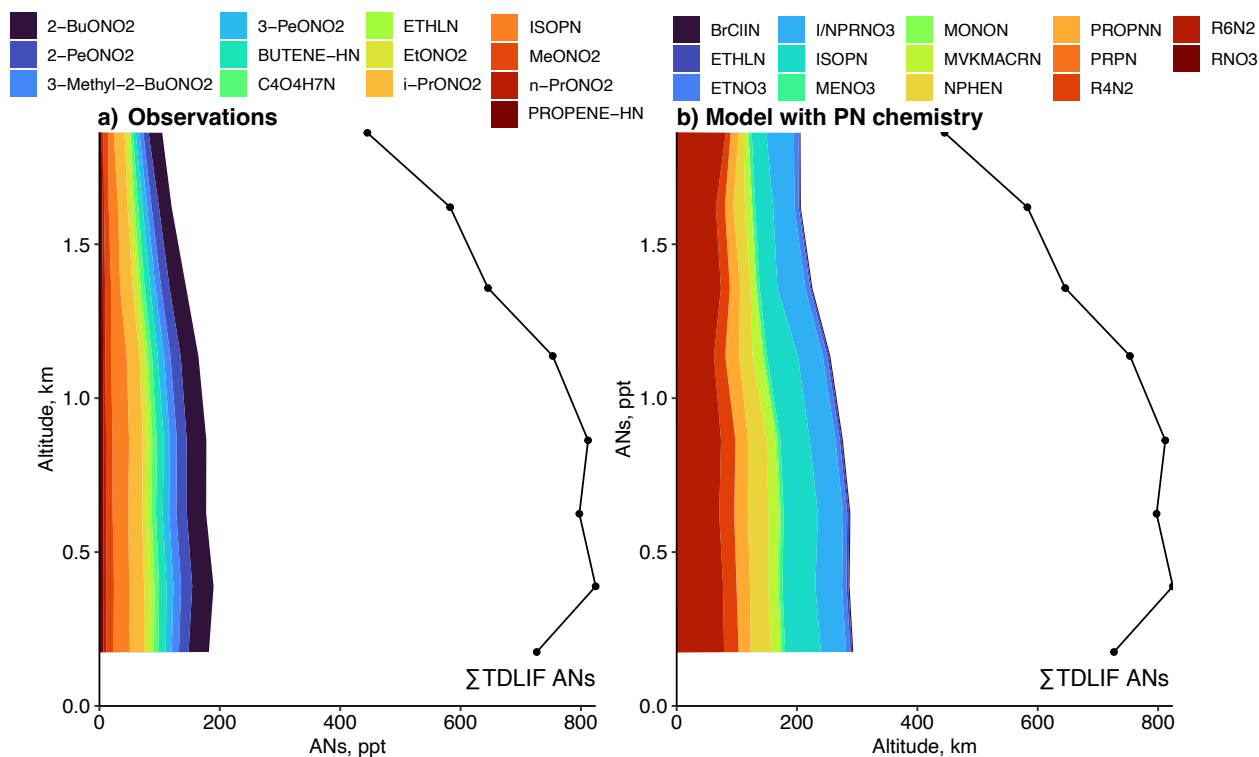

**Figure S4** – Speciated mean vertical profiles of modeled ANs for the domain of Fig. 1 compared against observed ANs (solid black line) for a) observations and b) model with added PN chemistry.



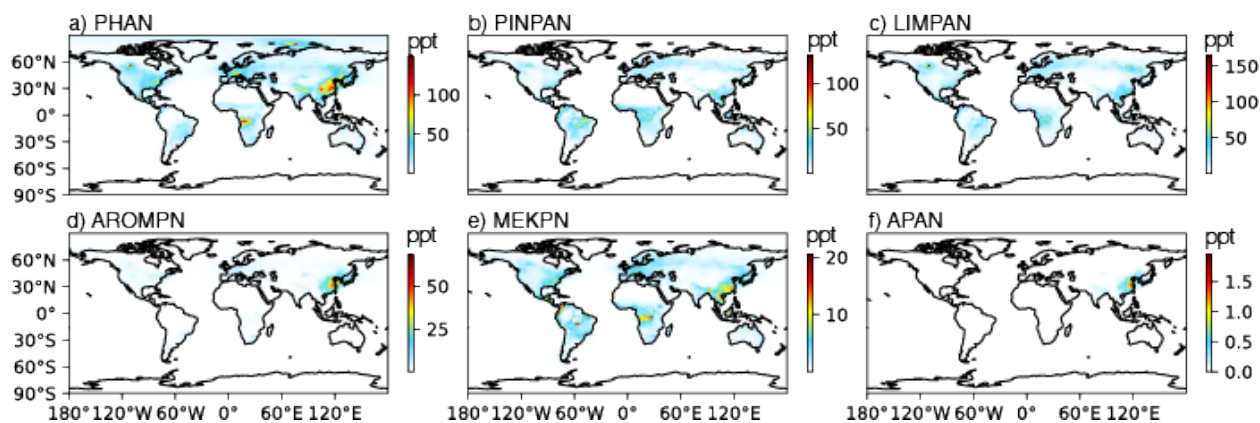

**Figure S4** – Global average surface concentrations at  $2 \times 2.5^\circ$  from 5/1/16 to 6/10/16 for a) PHAN, b) PINPAN, c) LIMPAN, d) AROMPN, e) MEKPN, and f) APAN.

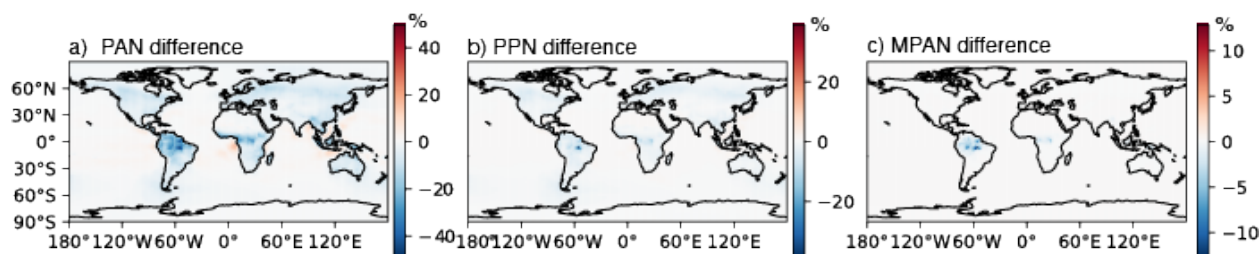

**Figure S5** – Global average difference at  $2 \times 2.5^\circ$  from 5/1/16 to 6/10/16 between the model with scaled VOCs and new PN chemistry and the base model for a) PAN, b) PPN, and c) MPAN.

## Section S1. Exploring model biases with F0AM

We perform a box-modeling experiment to see whether the good agreement with observed HCHO (found by Nault et al. (2024) in their work simulating airborne observations with F0AM) would be degraded in a similar manner as GEOS-Chem which underestimated HCHO by approximately 50% in the base model (Section 4) when applying the model bias to the F0AM setup described in Nault et al. (2024). We first reduce the concentrations of the VOCs and CO input into F0AM by the model bias given in Table S3 for the lowest model layer ( $\sim 0.2$  km). As shown in Fig. S6, reduced VOCs and CO result in F0AM underestimating HCHO by 24%. Mean model OH increased by 11% from  $4.6E6$  to  $5.1E6$  molec  $cm^{-3}$ , which we attribute to the reduced sink from CO and VOCs. Average F0AM-calculated OH reactivity went down  $2$  s $^{-1}$  from  $9$  s $^{-1}$  to  $7$  s $^{-1}$ , and pO $_3$  went down 2 ppb hr $^{-1}$ , from an average of 5 ppb hr $^{-1}$  to 3 ppb hr $^{-1}$ . However, as shown in Fig. S6, NO $_2$  was in good agreement with observations, as ozone is the main driver of conversion of NO to NO $_2$ . Constraining ozone in our F0AM model to observations was inconsistent in our attempts to understand the impact of the VOC and CO bias on model chemistry, as this bias reduced pO $_3$  by 20%. When we also considered the GEOS-Chem ozone bias of -25% as part of our model inputs, we found that the good agreement with observed NO $_2$  was degraded to a bias of -22% and the formaldehyde bias partially improved from -24% to -19% (Fig. S7). Mean model OH increased by only 5% as the reduced sink from VOCs was balanced by reduced loss of OH by NO $_2$  + OH to produce HNO $_3$ . Therefore, we summarize the impacts of insufficient VOCs and CO in GEOS-Chem as 1) missing production of ozone from VOCs and CO through HO $_2$ /RO $_2$  + NO, 2) underestimated loss of OH by reaction with VOCs and CO, 3) underestimated conversion of NO to NO $_2$  by ozone which results in underestimated loss of OH by reaction with NO $_2$ .

In GEOS-Chem, when we scaled up the species in Table S3 (except for ozone), we reduced the model HCHO bias from -47% to -32% (1 ppb). This is in contrast to F0AM where the constrained VOCs, CO, and methane were able to reproduce HCHO observations (Nault et al., 2024). We explain the remaining low bias in GEOS-Chem by the fact that 1) the model underestimates reactivity of intermediate species which provide additional HCHO production, and conversion of NO to NO $_2$  by HO $_2$  and RO $_2$ ; 2) we are not able to achieve perfect agreement with VOC observations, which is possible with F0AM; and 3) model ozone remains underestimated leading to insufficient NO $_2$  and thus insufficient loss of OH resulting in a HCHO lifetime against OH that is too short. This NO $_2$  underestimate is made worse by insufficient model resolution in addition to underestimated VOCs. As discussed in Section 4, underestimated model ozone could have additional factors such as insufficient production upwind where constraints on model VOCs and CO are minimal, or production from mechanisms such as photolysis of particulate nitrate.

**Table S3.** Scale factors for modeled VOCs

| Species | Base Model Bias <sup>1</sup> | Scale VOCs Bias <sup>1</sup> |
|---------|------------------------------|------------------------------|
| ACET    | -44%                         | -4%                          |
| ALK4    | -40%                         | +15%                         |
| BENZ    | -38%                         | +8%                          |
| C2H2    | -40%                         | -4%                          |
| C3H8    | -71%                         | +16%                         |
| CO      | -28%                         | -7%                          |
| EBZ     | -50%                         | -2%                          |
| EOH     | -95%                         | +13                          |
| MEK     | -78%                         | -4%                          |
| MOH     | -88%                         | -14%                         |
| MTPA    | -57%                         | +5                           |
| TMB     | +93                          | -43%                         |
| TOLU    | -30%                         | -12%                         |
| STYR    | -84%                         | -29%                         |
| XYLE    | -39%                         | -14%                         |
| O3      | -23%                         | -16%                         |

<sup>1</sup>Average below 2km from Figure S1.

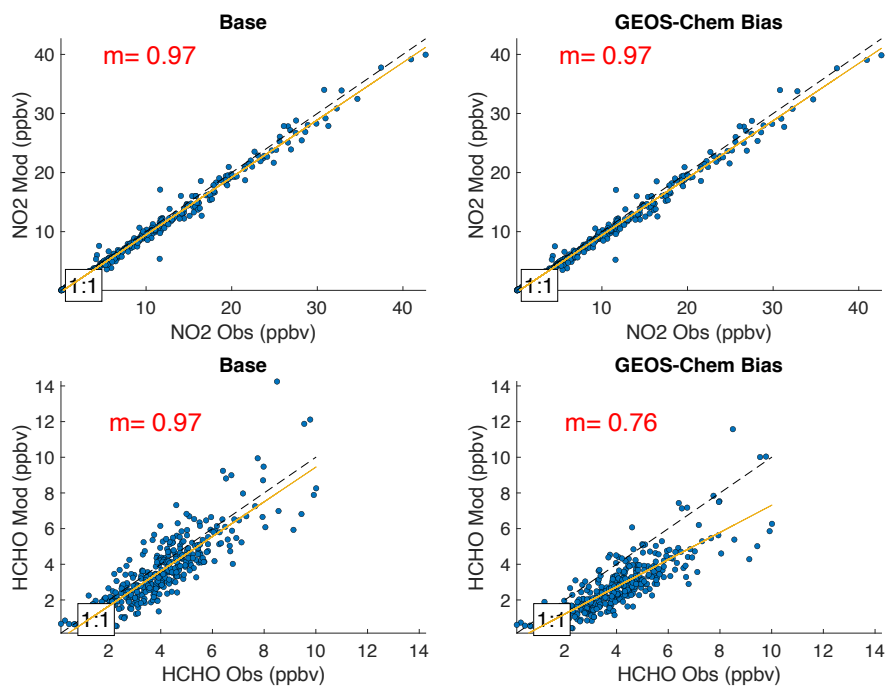

**Figure S6** – F0AM results from the base model described in Nault et al. (2024) and after applying the model bias in Table S3 (“GEOS-Chem Bias”). The slope of the regression line is given inset and the dashed line shows the 1-1 line.

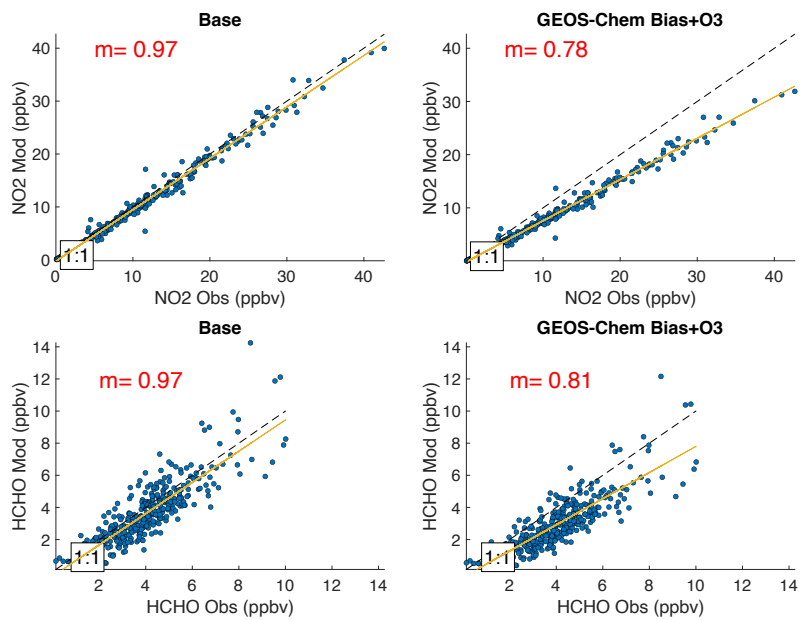

**Figure S7** – Same as Fig. S6 but now showing the F0AM simulation including the model ozone bias (“GEOS-Chem Bias+O3”).
